# Supplementary material
Source: publisher figshare collection journal article supplement (https://acs.figshare.com/ndownloader/files/9081220)
Supplement: Supplementary file 1 [file 9081220]

## Supporting Information

### **Synergistic Antioxidant Performance of Lignin and Quercetin Mixtures**

Di Liu,<sup>†</sup> Ying Li,<sup>†</sup> Yong Qian,<sup>\*,†,‡</sup> Yang Xiao,<sup>†</sup> Shengjun Du,<sup>†</sup> and Xueqing Qiu,<sup>\*,†,‡</sup>

<sup>†</sup>School of Chemistry and Chemical Engineering, South China University of Technology, 381 Wushan Road, Tianhe District, Guangzhou 510640, P. R. China

<sup>‡</sup>State Key Laboratory of Pulp and Paper Engineering, South China University of Technology, 381 Wushan Road, Tianhe District, Guangzhou 510640, P. R. China

E-mail: xueqingqiu66@163.com (X. Q. Qiu) qianyong86@163.com (Y. Qian).

It Includes 6 Pages, 2 Tables and 3 Figures.

**Table S1.** The physicochemical properties of lignin

| Properties                                       | Content      |
|--------------------------------------------------|--------------|
| Moisture %                                       | $\leq 2.41$  |
| Fixed carbon content %                           | $\leq 21.01$ |
| Ash content %                                    | $\leq 0.16$  |
| <sup>a</sup> S/ <sup>b</sup> G/ <sup>c</sup> H % | 2/88/10      |
| $\omega(\text{N})\%$                             | 0.2          |
| $\omega(\text{C})\%$                             | 66.61        |
| $\omega(\text{H})\%$                             | 6.285        |
| $\omega(\text{O})\%$                             | 26.905       |
| $M_n$                                            | 1360         |
| $M_w$                                            | 2569         |
| Polydispersity                                   | 1.88897      |

<sup>a</sup> S represents syringyl unit.

<sup>b</sup> G represents guaiacyl phenolic unit.

<sup>c</sup> H represents p-hydroxyphenyl unit.

**Table S2.** UV absorbance of initial and remaining DPPH radicals after being scavenged by lignin, quercetin and their mixture.

| Samples     | Initial<br>DPPH | DPPH<br>+Lignin | DPPH<br>+Lignin<br>+4h UV<br>Radiation |  | DPPH+<br>Quercetin<br>+ 4h UV<br>Radiation |       | DPPH+<br>Lignin/<br>Quercetin<br>+4h UV<br>Radiation |       |
|-------------|-----------------|-----------------|----------------------------------------|--|--------------------------------------------|-------|------------------------------------------------------|-------|
|             |                 |                 |                                        |  |                                            |       |                                                      |       |
| Absorbance  | 0.380           | 0.101           | 0.210                                  |  | 0.016                                      | 0.179 | 0.074                                                | 0.126 |
| * Reduction |                 | 28.55%          |                                        |  | 42.95%                                     |       | 13.76%                                               |       |

$$* \text{ Reduction} = (\text{UV}_{\text{Initial}} - \text{UV}_{\text{Before}}) - (\text{UV}_{\text{Initial}} - \text{UV}_{\text{After}}) / \text{UV}_{\text{Initial}} \times 100\%.$$

$\text{UV}_{\text{Initial}}$  represents the absorbance of initial DPPH radicals.  $\text{UV}_{\text{Before}}$  and  $\text{UV}_{\text{After}}$  represent UV absorbance of remaining DPPH radicals after being scavenged by lignin/quercetin mixture before and after 4h UV radiation respectively.

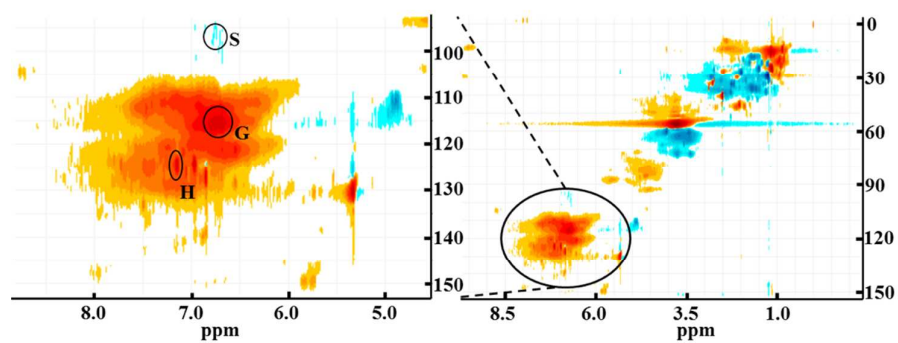

**Figure S1.** 2D HSC NMR spectra of lignin.

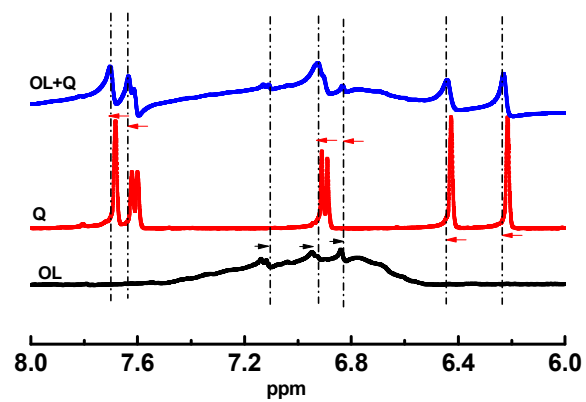

**Figure S2.**  $^1\text{H}$  NMR spectra of lignin, quercetin and their mixture.

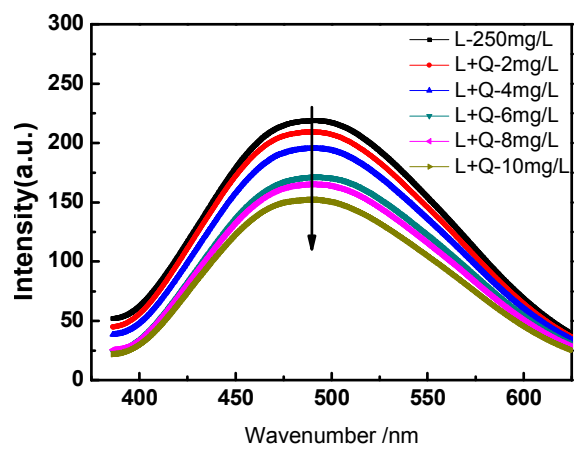

**Figure S3.** Fluorescence spectra of lignin in dioxane aqueous solution with increasing concentration of quercetin.
